# Supplementary material for: Do I want to work from home today? Specific job crafting strategies of public service employees working from home during the COVID-19 pandemic in Germany: a qualitative study
Source: Frontiers journal article supplement (doi:10.3389/fpsyg.2023.1183812), 2023-10-13
Supplement: Data_Sheet_2.PDF [file Data_Sheet_2.PDF]

## Supplementary | Interview guideline questions.

| Guiding Questions                                                                                                                                                              | Sub-Questions                                                                                                                                                                                                                                                                                                                                                                                                                                                                                                                                                               |
|--------------------------------------------------------------------------------------------------------------------------------------------------------------------------------|-----------------------------------------------------------------------------------------------------------------------------------------------------------------------------------------------------------------------------------------------------------------------------------------------------------------------------------------------------------------------------------------------------------------------------------------------------------------------------------------------------------------------------------------------------------------------------|
| <b>Warm-Up Question</b>                                                                                                                                                        |                                                                                                                                                                                                                                                                                                                                                                                                                                                                                                                                                                             |
| Please tell me briefly how the introduction of WFH went in your agency.                                                                                                        | <ul style="list-style-type: none"> <li>- Certain regulations on the part of the agency?</li> <li>- How were these coordinated?</li> <li>- Will WFH remain in the future?</li> </ul>                                                                                                                                                                                                                                                                                                                                                                                         |
| <b>Organization of Work</b>                                                                                                                                                    |                                                                                                                                                                                                                                                                                                                                                                                                                                                                                                                                                                             |
| Please tell me what a typical day looks like, when you work from home.                                                                                                         | <ul style="list-style-type: none"> <li>- Do you stick to a certain daily routine?</li> <li>- Have you found your own personal approach to the daily work routine when WFH?</li> <li>- When and how are you available for colleagues?</li> <li>- What has helped you to organize your work when WFH?</li> </ul>                                                                                                                                                                                                                                                              |
| In what way can you see differences to the way you work when you were present at the office?                                                                                   | <ul style="list-style-type: none"> <li>- Have you found that you work different hours than when you were present at the office?</li> <li>- Has your workload changed? <ul style="list-style-type: none"> <li>• Unchanged/increased/decreased?</li> </ul> </li> </ul>                                                                                                                                                                                                                                                                                                        |
| Please tell me about the difficulties you experienced at the beginning when WFH.                                                                                               | <ul style="list-style-type: none"> <li>- What has improved this now?</li> <li>- What has helped you?</li> </ul>                                                                                                                                                                                                                                                                                                                                                                                                                                                             |
| <b>Scope of Action</b>                                                                                                                                                         |                                                                                                                                                                                                                                                                                                                                                                                                                                                                                                                                                                             |
| Please tell me about the freedom you have in completing your work tasks when WFH.                                                                                              | <ul style="list-style-type: none"> <li>- What do you like about your work? (What motivates you?)</li> <li>- To what extent do you have time or performance constraints?</li> <li>- To what extent are mistakes tolerated? (Control)</li> <li>- How much responsibility are you given?</li> </ul>                                                                                                                                                                                                                                                                            |
| To what extent do you notice differences compared to your freedom/ scope for action in presence?                                                                               | <ul style="list-style-type: none"> <li>- To what extent do you feel pressure to perform? (more/less)</li> <li>- Is the work more/less controlled?</li> <li>- ((work intensification?))</li> </ul>                                                                                                                                                                                                                                                                                                                                                                           |
| <b>Leadership and Collaboration</b>                                                                                                                                            |                                                                                                                                                                                                                                                                                                                                                                                                                                                                                                                                                                             |
| Tell me how you perceive the interaction between managers and employees in your agency.                                                                                        | <ul style="list-style-type: none"> <li>- How often are you in contact/communication with your manager?</li> <li>- How is the communication with your manager in the home office? <ul style="list-style-type: none"> <li>• Does the need for discussion come from you or does the manager approach you?</li> </ul> </li> <li>- How do you experience recognition and appreciation at your workplace? (on the part of colleagues, on the part of the manager)</li> <li>- In what form does your manager express criticism? How do you deal with it? (work, person)</li> </ul> |
| To what extent can you identify differences in the way managers and employees deal with each other when they are present?                                                      | <ul style="list-style-type: none"> <li>- How does behavior transfer to the WFH situation?</li> </ul>                                                                                                                                                                                                                                                                                                                                                                                                                                                                        |
| <u>Example:</u> Do you have the feeling that there are colleagues in your organization who intentionally send emails very early or very late, which was not common before WFH? | <ul style="list-style-type: none"> <li>- Did you notice something in this way?</li> <li>- What do you think is the reason for this? (e.g. recognition performance, commitment)</li> </ul>                                                                                                                                                                                                                                                                                                                                                                                   |
| <b>Health</b>                                                                                                                                                                  |                                                                                                                                                                                                                                                                                                                                                                                                                                                                                                                                                                             |
| Please tell me how working from home affects your health.                                                                                                                      | <ul style="list-style-type: none"> <li>- Positive/ negative?</li> <li>- Why is it so?</li> <li>- Physical problems (e.g. tension, fatigue, headaches)</li> <li>- Mental problems (balanced, full of energy vs. feeling anxious, distracted)</li> <li>- Life satisfaction?</li> </ul>                                                                                                                                                                                                                                                                                        |
| How was it for you in presence? (Can you notice any differences in your physical or mental health?)                                                                            | <ul style="list-style-type: none"> <li>- Positive/ negative?</li> <li>- Why is it so?</li> <li>- Physical problems (e.g. tension, fatigue, headaches)</li> <li>- Mental problems (balanced, full of energy vs. feeling anxious, distracted)</li> </ul>                                                                                                                                                                                                                                                                                                                      |

---

- Life satisfaction?

---

- If applicable, what is the biggest advantage of the home office for you?

---

- How would you act when WFH?

Case: You notice cold symptoms in yourself.

- How would you act when working in presence?

Would you go to work?

- Why yes / Why not?

---

Finally, is there anything you would like to add that you have not yet mentioned?
